# Supplementary material for: An integrated quantification method to increase the precision, robustness, and resolution of protein measurement in human plasma samples
Source: PubMed Central journal article supplement (PMC4363461; doi:10.1186/1559-0275-12-3), 2015-01-29
Supplement: 12014_2014_91_MOESM2_ESM.pdf [file 12014_2014_91_MOESM2_ESM.pdf]

**Table S1 Sample layout in the three assessment studies<sup>a,b</sup>**

| Position | Study I |     |     | Study II |     |     | Study III <sup>c</sup> |       |
|----------|---------|-----|-----|----------|-----|-----|------------------------|-------|
|          | Batch   |     |     | Batch    |     |     | Batch                  |       |
|          | 1       | 2   | 3   | 1        | 2   | 3   | 1                      | 2     |
| 1        | HPS     | HPS | HPS | HPS      | HPS | HPS | HPS                    | HPS   |
| 2        | S1      | S21 | S41 | S1       | S13 | S16 | S1-L1                  | S1-L0 |
| 3        | S2      | S22 | S42 | S2       | S2  | S2  | S1-L0                  | S1-L2 |
| 4        | S3      | S23 | S43 | S3       | S14 | S17 | S1-L2                  | S1-L1 |
| 5        | S4      | S24 | S44 | S4       | S4  | S4  | S2-L0                  | S2-L1 |
| 6        | S5      | S25 | S45 | S5       | S15 | S18 | S2-L2                  | S2-L0 |
| 7        | S6      | S26 | S46 | S6       | S6  | S6  | S2-L1                  | S2-L2 |
| 8        | HPS     | HPS | HPS | HPS      | HPS | HPS | HPS                    | HPS   |
| 9        | S7      | S27 | S47 | S1       | S13 | S16 | S3-L2                  | S3-L0 |
| 10       | S8      | S28 | S48 | S7       | S7  | S7  | S3-L1                  | S3-L2 |
| 11       | S9      | S29 | S49 | S3       | S14 | S17 | S3-L0                  | S3-L1 |
| 12       | S10     | S30 | S50 | S8       | S8  | S8  | S4-L1                  | S4-L2 |
| 13       | S11     | S31 | S51 | S5       | S15 | S18 | S4-L0                  | S4-L1 |
| 14       | S12     | S32 | S52 | S9       | S9  | S9  | S4-L2                  | S4-L0 |
| 15       | S13     | S33 | S53 | HPS      | HPS | HPS | HPS                    | HPS   |
| 16       | S14     | S34 | S54 | S1       | S13 | S16 | S5-L1                  | S5-L0 |
| 17       | HPS     | HPS | HPS | S10      | S10 | S10 | S5-L2                  | S5-L1 |
| 18       | S15     | S35 | S55 | S3       | S14 | S17 | S5-L0                  | S5-L2 |
| 19       | S16     | S36 | S56 | S11      | S11 | S11 | S6-L0                  | S6-L1 |
| 20       | S17     | S37 | S57 | S5       | S15 | S18 | S6-L1                  | S6-L2 |
| 21       | S18     | S38 | S58 | S12      | S12 | S12 | S6-L2                  | S6-L0 |
| 22       | S19     | S39 | S59 | HPS      | HPS | HPS | HPS                    | HPS   |
| 23       | S20     | S40 | S60 | NC       | NC  | NC  | NC                     | NC    |
| 24       | HPS     | HPS | HPS | NC       | NC  | NC  | NC                     | NC    |

<sup>a</sup>HPS, human plasma standard. NC, negative control (0.15 M (NH<sub>4</sub>)HCO<sub>3</sub>).

<sup>b</sup>Samples with no data were highlighted in box and were lost due to 1) unexpected pump stoppage and restarting during depletion (the first HPS in Study I), 2) sample exhaustion (the sample in Study III) or 3) sample contamination during solid-phase extraction (all other samples).

<sup>c</sup>The loading volume for samples labeled as L0, L1, and L2 was 30, 20 or 15  $\mu$ l, respectively.
