# Supplementary material for: An integrated quantification method to increase the precision, robustness, and resolution of protein measurement in human plasma samples
Source: PubMed Central journal article supplement (PMC4363461; doi:10.1186/1559-0275-12-3), 2015-01-29
Supplement: 12014_2014_91_MOESM3_ESM.pdf [file 12014_2014_91_MOESM3_ESM.pdf]

**Table S2 Clinical information of patients in Study I**

| Subject | Disease Status | Cancer Stage | Histopathology of Cancer | Gender | Age | Nodule Size (mm) | Smoking Status | Pack-Year |
|---------|----------------|--------------|--------------------------|--------|-----|------------------|----------------|-----------|
| S1      | Benign         |              |                          | Male   | 69  | 33               | Past           | 98        |
| S2      | Cancer         | I            | ADENOCARCINOMA w/MIXED   | Male   | 71  | 6                | Past           | 25        |
| S3      | Cancer         | I            | SQUAMOUS                 | Male   | 53  | 45               | Past           | 114       |
| S4      | Benign         |              |                          | Male   | 56  | 26               | Past           | 10        |
| S5      | Benign         |              |                          | Female | 63  | 35               | Never          | 0         |
| S6      | Cancer         | I            | ADENOCARCINOMA           | Female | 64  | 39               | Past           | 7.5       |
| S7      | Benign         |              |                          | Male   | 67  | 47.5             | Current        | 55        |
| S8      | Cancer         | II           | SQUAMOUS                 | Male   | 72  | 43               | Past           | 48        |
| S9      | Benign         |              |                          | Male   | 58  | 25               | Current        | 40        |
| S10     | Cancer         | I            | ADENOCARCINOMA           | Male   | 57  | 30               | Past           | 40        |
| S11     | Cancer         | I            | ADENOCARCINOMA           | Male   | 61  | 36               | Past           | 20        |
| S12     | Benign         |              |                          | Male   | 55  | 22               | Past           | 15        |
| S13     | Benign         |              |                          | Female | 52  | 43               | Never          | 0         |
| S14     | Benign         |              |                          | Female | 46  | 40               | Current        | 30        |
| S15     | Benign         |              |                          | Male   | 52  | 38               | Past           | 9         |
| S16     | Cancer         | II           | MIXED                    | Male   | 48  | 40               | Current        | 35        |
| S17     | Benign         |              |                          | Male   | 64  | 32               | Past           | 12        |
| S18     | Cancer         | II           | SQUAMOUS                 | Male   | 62  | 24               | Current        | 92        |
| S19     | Cancer         | I            | SQUAMOUS                 | Male   | 73  | 32               | Past           | 130       |
| S20     | Benign         |              |                          | Male   | 74  | 22               | Never          | 0         |
| S21     | Cancer         | II           | ADENOCARCINOMA           | Female | 67  | 40               | Past           | 40        |
| S22     | Benign         |              |                          | Female | 66  | 40               | Never          | 0         |
| S23     | Cancer         | I            | ADENOCARCINOMA           | Male   | 60  | 12               | Past           | 17.5      |
| S24     | Benign         |              |                          | Male   | 62  | 40               | Past           | NA        |
| S25     | Benign         |              |                          | Female | 76  | 40               | Never          | 0         |
| S26     | Cancer         | II           | ADENOCARCINOMA           | Female | 75  | 44               | Past           | 58        |
| S27     | Benign         |              |                          | Female | 62  | 23               | Past           | NA        |
| S28     | Cancer         | I            | ADENOCARCINOMA           | Female | 58  | 22               | Current        | 19        |
| S29     | Benign         |              |                          | Male   | 43  | 56               | Current        | 30        |
| S30     | Cancer         | II           | SQUAMOUS                 | Male   | 51  | 58               | Past           | 95        |
| S31     | Benign         |              |                          | Male   | 77  | 26               | NA             | 45.6      |
| S32     | Cancer         | I            | ADENOCARCINOMA           | Male   | 75  | 9                | Past           | 91.5      |
| S33     | Cancer         | II           | ADENOCARCINOMA           | Male   | 79  | 50               | Past           | 12.5      |
| S34     | Benign         |              |                          | Male   | 78  | 48               | Past           | NA        |
| S35     | Cancer         | II           | NA                       | Female | 56  | 24               | Past           | 36        |
| S36     | Benign         |              |                          | Female | 59  | 24               | Past           | 47.5      |
| S37     | Benign         |              |                          | Female | 64  | 26               | Never          | 0         |
| S38     | Cancer         | I            | ADENOCARCINOMA           | Female | 64  | 33               | Never          | 0         |
| S39     | Benign         |              |                          | Female | 53  | 54               | Past           | 30        |

**Table S2 Clinical information of patients in Study I**

| Subject | Disease Status | Cancer Stage | Histopathology of Cancer | Gender | Age | Nodule Size (mm) | Smoking Status | Pack-Year |
|---------|----------------|--------------|--------------------------|--------|-----|------------------|----------------|-----------|
| S40     | Cancer         | II           | ADENOCARCINOMA           | Female | 72  | 32               | Current        | 50        |
| S41     | Benign         |              |                          | Female | 61  | 35               | Past           | 25        |
| S42     | Cancer         | II           | ADENOCARCINOMA w/MIXED   | Female | 60  | 25               | Current        | 90        |
| S43     | Benign         |              |                          | Female | 38  | 22               | Never          | 0         |
| S44     | Cancer         | II           | ADENOCARCINOMA           | Female | 75  | 45               | Current        | 12.5      |
| S45     | Benign         |              |                          | Male   | 65  | 24               | Past           | 30        |
| S46     | Cancer         | I            | ADENOCARCINOMA           | Male   | 64  | 50               | Past           | NA        |
| S47     | Cancer         | II           | SQUAMOUS                 | Female | 47  | 55               | Never          | 0         |
| S48     | Benign         |              |                          | Female | 52  | 24               | Past           | 15        |
| S49     | Cancer         | IIA          | SQUAMOUS                 | Male   | 82  | 34               | Past           | 30        |
| S50     | Benign         |              |                          | Male   | 84  | 32               | Past           | 30        |
| S51     | Cancer         | II           | SQUAMOUS                 | Female | 63  | 47               | Past           | 15        |
| S52     | Benign         |              |                          | Male   | 44  | 45               | Past           | 30        |
| S53     | Benign         |              |                          | Male   | 41  | 31               | Past           | 20        |
| S54     | Cancer         | II           | ADENOCARCINOMA           | Male   | 51  | 35               | Past           | 30        |
| S55     | Cancer         | II           | SQUAMOUS                 | Female | 67  | 52               | Current        | NA        |
| S56     | Benign         |              |                          | Female | 65  | 42               | Never          | 0         |
| S57     | Benign         |              |                          | Female | 54  | 5                | Past           | 20        |
| S58     | Cancer         | II           | ADENOCARCINOMA w/MIXED   | Female | 67  | 44               | Past           | 30        |
| S59     | Benign         |              |                          | Female | 60  | 41               | Current        | 40        |
| S60     | Cancer         | II           | ADENOCARCINOMA           | Female | 61  | 27               | Past           | 40        |
