# Supplementary material for: An integrated quantification method to increase the precision, robustness, and resolution of protein measurement in human plasma samples
Source: PubMed Central journal article supplement (PMC4363461; doi:10.1186/1559-0275-12-3), 2015-01-29
Supplement: 12014_2014_91_MOESM4_ESM.pdf [file 12014_2014_91_MOESM4_ESM.pdf]

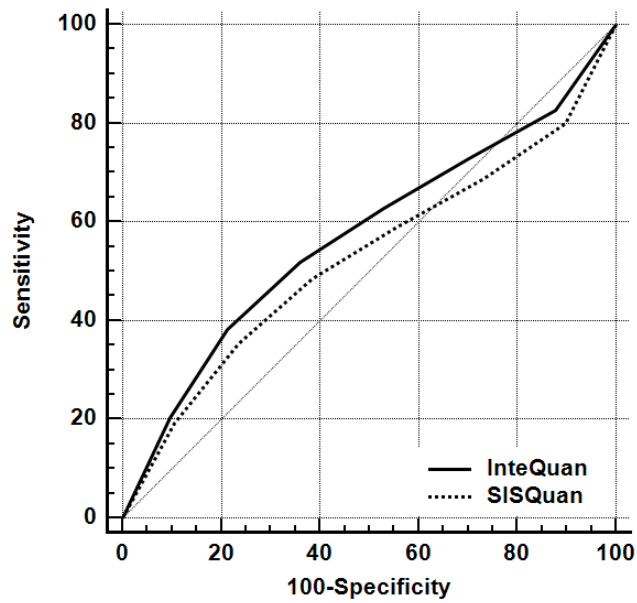

**Figure S2 Receiver operating characteristic curves of the panel of all 16 target proteins, evaluated with Monte Carlo cross validation (MCCV) on clinical samples in Study I. Proteins were quantified using InteQuan (solid line) or SISQuan (dotted line).**
