# Supplementary material for: An integrated quantification method to increase the precision, robustness, and resolution of protein measurement in human plasma samples
Source: PubMed Central journal article supplement (PMC4363461; doi:10.1186/1559-0275-12-3), 2015-01-29
Supplement: 12014_2014_91_MOESM5_ESM.pdf [file 12014_2014_91_MOESM5_ESM.pdf]

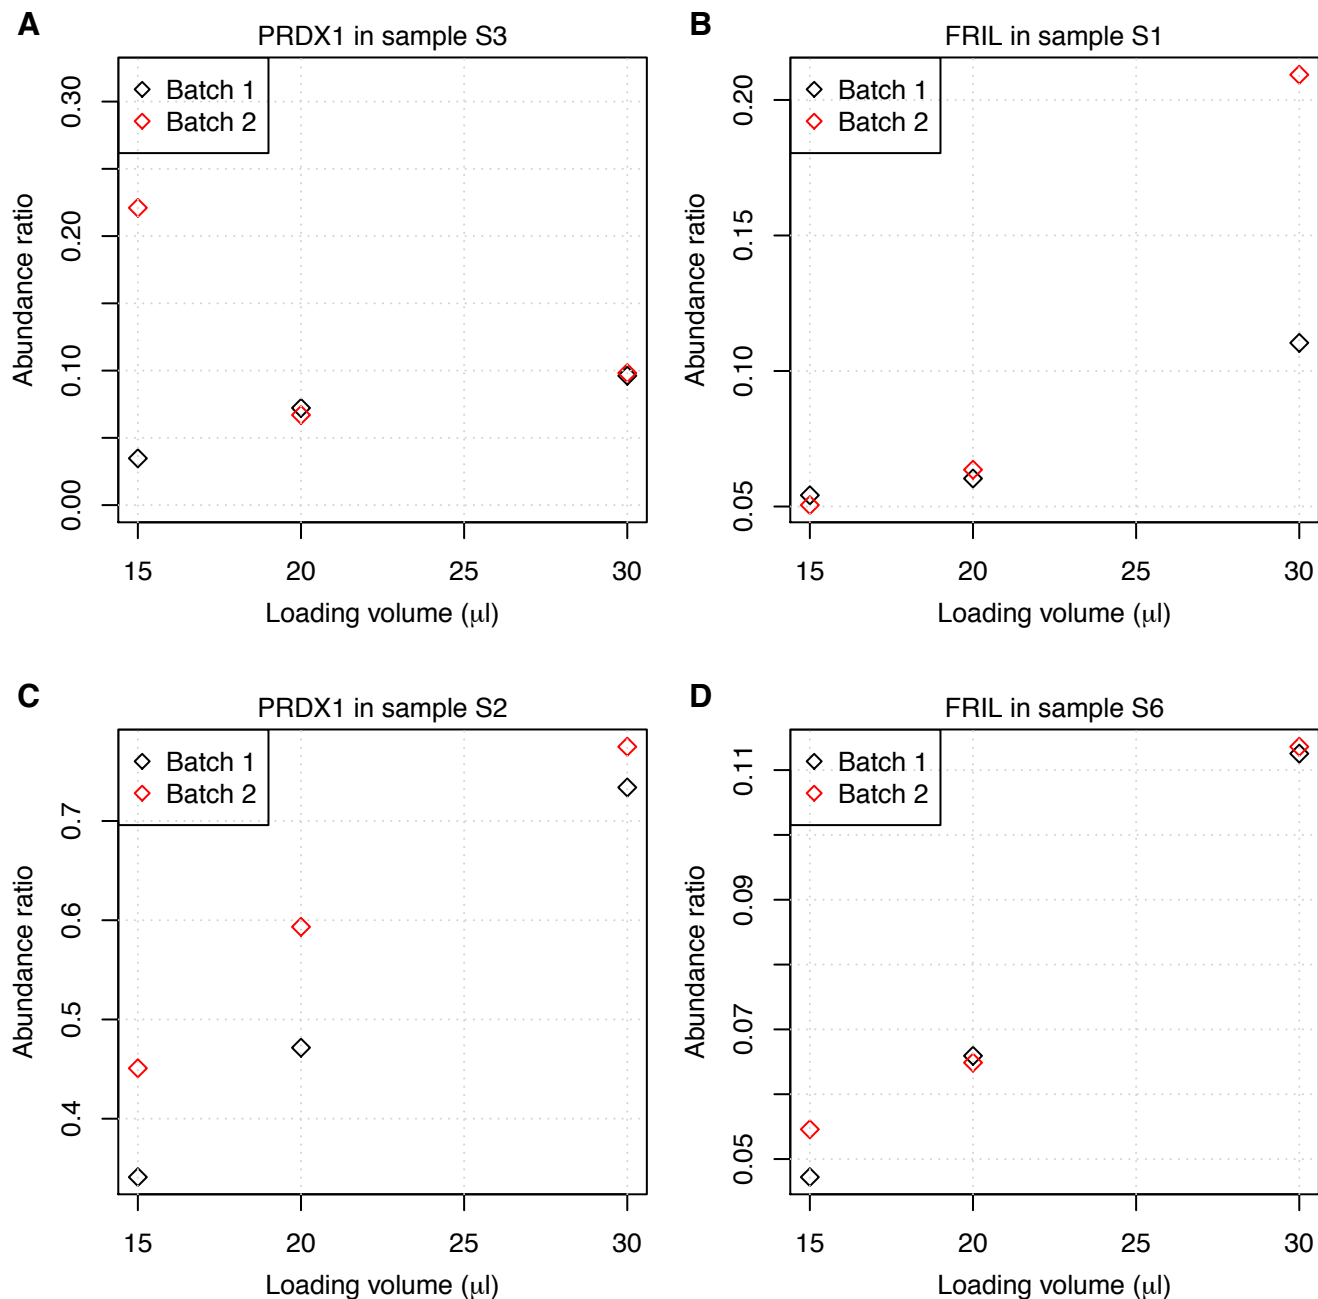

**Figure S3 Examples of SISQuan abundance versus loading volume in Study III.**

The top row shows two outlier measurements while the bottom row shows the corresponding linear behavior of the same proteins. **(A)** PRDX1 in sample S3. The outlier measurement (Batch 2 with the loading volume of 15  $\mu\text{l}$ ) was removed from analysis. **(B)** FRIL in sample S1. The outlier measurement (Batch 2 with the loading volume of 30  $\mu\text{l}$ ) was removed from analysis. **(C)** PRDX1 in sample S2. **(D)** FRIL in sample S6.
