# Supplementary material for: An integrated quantification method to increase the precision, robustness, and resolution of protein measurement in human plasma samples
Source: PubMed Central journal article supplement (PMC4363461; doi:10.1186/1559-0275-12-3), 2015-01-29
Supplement: 12014_2014_91_MOESM6_ESM.pdf [file 12014_2014_91_MOESM6_ESM.pdf]

**Table S3 Summary of main experimental differences among the three assessment studies and major instrument services**

| <b>Procedure</b>          | <b>Description</b>                 | <b>Study I</b>                                                                                                                                                                                                                 | <b>Study III</b>        | <b>Study II</b>                                                                 |
|---------------------------|------------------------------------|--------------------------------------------------------------------------------------------------------------------------------------------------------------------------------------------------------------------------------|-------------------------|---------------------------------------------------------------------------------|
| Depletion                 | Date                               | 18-21 Nov 2012                                                                                                                                                                                                                 | 21-23 Feb 2013          | 15-17 Apr 2013                                                                  |
|                           | Operator                           | JM                                                                                                                                                                                                                             | JM                      | JM                                                                              |
|                           | Column lot                         | 20093648                                                                                                                                                                                                                       | 20093648 &<br>SLBD7383  | 3315179                                                                         |
|                           | HPLC machine                       | HPLC-LC00001                                                                                                                                                                                                                   | HPLC-LC00001            | HPLC-LC-00001: Batch 1 & 2<br>HPLC-LC-00002: Batch 3                            |
|                           | HPLC service <sup>a</sup>          | 18 Nov 2012                                                                                                                                                                                                                    | 20 & 22 Feb 2013        | HPLC-LC00001: 26, 28 & 29<br>Mar; 15 & 17 Apr 2013<br>HPLC-LC00002: 17 Apr 2013 |
| Digestion                 | Date                               | 26-27 Nov 2012                                                                                                                                                                                                                 | 28 Feb - 01 Mar<br>2013 | 23-24 Apr 2013                                                                  |
|                           | Operator                           | DAS                                                                                                                                                                                                                            | JM                      | DAS/JM                                                                          |
| Solid-phase<br>extraction | Date                               | 3-4 Dec 2012                                                                                                                                                                                                                   | 03-04 Mar 2013          | 25-26 Apr 2013                                                                  |
|                           | Operator                           | DAS                                                                                                                                                                                                                            | JM                      | DAS/JM                                                                          |
| MS analysis               | Date                               | 11 Dec 2012 - 9<br>Jan 2013                                                                                                                                                                                                    | 6-10 Mar 2013           | 29 Apr - 5 May 2013                                                             |
|                           | Operator                           | JT                                                                                                                                                                                                                             | DAS                     | DAS                                                                             |
|                           | SIS lot                            | Lot 1                                                                                                                                                                                                                          | Lot 1                   | Lot 2                                                                           |
|                           | RP column lot                      | Not Recorded                                                                                                                                                                                                                   | S/N USCGC02709          | S/N USCGC02348                                                                  |
|                           | RP HPLC<br>service in Year<br>2013 | HPLC Flush (17 Jan), analytical column change (14 Feb, 21 & 25 Mar),<br>B side check valve replaced (15 Feb), A side pump head replaced (19<br>Feb), B side pump head replaced (4 Mar), and PM service on LC unit<br>(11 Mar). |                         |                                                                                 |
|                           | MS service                         | Hexa bore capillary change (18 Dec 2012, 6 Feb 2013, 4 Mar 2013)<br>and Ion funnels cleaned & PM on MS (11 Mar 2013).                                                                                                          |                         |                                                                                 |
|                           | Data curation                      | JT                                                                                                                                                                                                                             | DAS                     | DAS                                                                             |

<sup>a</sup>Changed depletion column, purge valve frit, 2 inline filters, and needle seat.
